# Supplementary material
Source: PubMed Central journal article supplement (PMC3258336)
Supplement: NIHMS342704-supplement-02.pdf [file NIHMS342704-supplement-02.pdf]

| Label #              | C(Me) SAS In Donut (Å) <sup>3</sup>                          | C(Me) SAS in protomer (Å) <sup>3</sup> | Buried / Exposed              | Mid-protomer / Interface            | Methyl direction                              | Structure group      | Sources of $\Delta\delta_s$ and $\Delta\omega_s$                                | Sources of $\Delta\delta_s$ and $\Delta\omega_s$                                           | Limits |      | Limits                                                                                                                                                                                                                                                                                                 |     | Limits |                      |          | Info source | Apo MRD  | Apo MRD                                                                                                                                                                                                                                                                                                                                                                                                                                                                                                                                                                                                                   | Apo MRD | Apo dynamics in $\mu$ s-ms time window (hypothesis) |
|----------------------|--------------------------------------------------------------|----------------------------------------|-------------------------------|-------------------------------------|-----------------------------------------------|----------------------|---------------------------------------------------------------------------------|--------------------------------------------------------------------------------------------|--------|------|--------------------------------------------------------------------------------------------------------------------------------------------------------------------------------------------------------------------------------------------------------------------------------------------------------|-----|--------|----------------------|----------|-------------|----------|---------------------------------------------------------------------------------------------------------------------------------------------------------------------------------------------------------------------------------------------------------------------------------------------------------------------------------------------------------------------------------------------------------------------------------------------------------------------------------------------------------------------------------------------------------------------------------------------------------------------------|---------|-----------------------------------------------------|
|                      |                                                              |                                        |                               |                                     |                                               |                      |                                                                                 |                                                                                            | 0 ppm  | 0.37 | 0 ppm                                                                                                                                                                                                                                                                                                  | 1.3 | 0 ppm  | 1.47                 | 1000 Hz  |             |          |                                                                                                                                                                                                                                                                                                                                                                                                                                                                                                                                                                                                                           |         |                                                     |
| Info source          | TRAP+Trp+RNA crystal 1CS5 <sup>***</sup>                     |                                        |                               |                                     |                                               |                      |                                                                                 |                                                                                            |        |      |                                                                                                                                                                                                                                                                                                        |     |        |                      |          |             |          |                                                                                                                                                                                                                                                                                                                                                                                                                                                                                                                                                                                                                           |         |                                                     |
|                      | TRAP+Trp+RNA structure and $\Delta\delta$ for removal of Trp |                                        |                               |                                     |                                               |                      |                                                                                 |                                                                                            |        |      |                                                                                                                                                                                                                                                                                                        |     |        |                      |          |             |          |                                                                                                                                                                                                                                                                                                                                                                                                                                                                                                                                                                                                                           |         |                                                     |
|                      | Average apo structure in ms time window (hypothesis)         |                                        |                               |                                     |                                               |                      |                                                                                 |                                                                                            |        |      |                                                                                                                                                                                                                                                                                                        |     |        |                      |          |             |          |                                                                                                                                                                                                                                                                                                                                                                                                                                                                                                                                                                                                                           |         |                                                     |
|                      | TRAP+Trp+RNA structure and $\Delta\delta$ for removal of Trp |                                        |                               |                                     |                                               |                      |                                                                                 |                                                                                            |        |      |                                                                                                                                                                                                                                                                                                        |     |        |                      |          |             |          |                                                                                                                                                                                                                                                                                                                                                                                                                                                                                                                                                                                                                           |         |                                                     |
|                      | Info source                                                  |                                        |                               |                                     |                                               |                      |                                                                                 |                                                                                            |        |      |                                                                                                                                                                                                                                                                                                        |     |        |                      |          |             |          |                                                                                                                                                                                                                                                                                                                                                                                                                                                                                                                                                                                                                           |         |                                                     |
| Val 10 <sub>y</sub>  | 0.0                                                          | 11.8                                   | Buried                        | Interface                           | To interface                                  | Interface (I)        | Phe9(Nbr) 5.6Å<br>Phe48(Self) 4.4Å                                              | Ile45 <sub>y</sub> (Nbr), Thr65 <sub>y</sub> (Self)                                        | 3%     | 10%  | • Small $\Delta\delta_s$ (+ small $\Delta\omega_s$ ) → Phe9 and Phe48 too far and/or same orientation as in holo<br>• Small $\Delta\omega_s$ → this apo interface is like holo                                                                                                                         |     |        | Val 10 <sub>y</sub>  | ?        | ?           | > 0      | • Non-zero $k_{ex}$ → some structural freedom at this interface                                                                                                                                                                                                                                                                                                                                                                                                                                                                                                                                                           |         |                                                     |
| Val 10 <sub>y</sub>  | 0.0                                                          | 1.6                                    | (Same as above)               | Mid-protomer                        | To core                                       | Core (C)             | Phe48(Self) 6.1Å                                                                | Ile120 <sub>y</sub> , Ile550 <sub>y</sub>                                                  | 7%     | 41%  | • Small $\Delta\delta_s$ → Phe 48 too far and/or same orientation as in holo TRAP<br>• Modest $\Delta\omega_s$ → this apo core is uniquely packed                                                                                                                                                      |     |        | Val 10 <sub>y</sub>  | ?        | ?           | 40%      | • Moderate $k_{ex}$ → moderate rate of motion at this interface                                                                                                                                                                                                                                                                                                                                                                                                                                                                                                                                                           |         |                                                     |
| Val 11 <sub>y</sub>  | 0.0                                                          | 15.6                                   | Buried                        | Interface                           | To interface                                  | Interface (I)        | Phe9(Self) 6.2Å<br>Tyr62(Self) 6.4Å                                             | Val43 <sub>y</sub> , Ile45 <sub>y</sub> , Ile70 <sub>y</sub> , $\delta_s$                  | 6%     | 5%   | • Small $\Delta\delta_s$ and $\Delta\omega_s$ → this apo interface is like holo                                                                                                                                                                                                                        |     |        | Val 11 <sub>y</sub>  | No Disp. | No Disp.    | No Disp. | • No dispersion → rigidity at this interface                                                                                                                                                                                                                                                                                                                                                                                                                                                                                                                                                                              |         |                                                     |
| Val 11 <sub>y</sub>  | 0.0                                                          | 15.8                                   | (Same as above)               | (Same as above)                     | (Same as above)                               | Interface (I)        | Phe9(Self) 3.8Å<br>His67(Nbr) 3.8Å                                              | Phe9, Ile45 <sub>y</sub> , His67(Nbr)                                                      | 20%    | 9%   | • Modest $\Delta\delta_s$ (+ small $\Delta\omega_s$ ) → Phe9 and/or Tyr62 unique apo orientation<br>• Small $\Delta\omega_s$ → this apo interface is like holo                                                                                                                                         |     |        | Val 11 <sub>y</sub>  | ?        | ?           | > 0      | • Non-zero $k_{ex}$ → some structural freedom at this interface                                                                                                                                                                                                                                                                                                                                                                                                                                                                                                                                                           |         |                                                     |
| Ile 120 <sub>y</sub> | 0.0                                                          | 0.0                                    | Buried                        | Mid-protomer (Center)               | To core                                       | Core (C)             | Trp ring 7Å                                                                     | Val10, Val21, Val57, Ile63                                                                 | 2%     | 56%  | • Small $\Delta\delta_s$ → Trp too far to alter $\delta_s$<br>• Modest $\Delta\omega_s$ → center of apo core uniquely packed                                                                                                                                                                           |     |        | Ile 120 <sub>y</sub> | ?        | ?           | 54%      | • Moderate $k_{ex}$ → moderate rate of motion in the core                                                                                                                                                                                                                                                                                                                                                                                                                                                                                                                                                                 |         |                                                     |
| Leu 150 <sub>y</sub> | 10.3                                                         | 10.3                                   | Exposed                       | Mid-protomer (at base)              | To surface (from base)                        | Surface (S)          | Solvent renders local field uniform (no $\Delta\delta_s$ nor $\Delta\omega_s$ ) | Lys13, Lys40, Lys60, Tyr62, Glu17 all on self                                              | 4%     | 5%   | • Small $\Delta\delta_s$ → consistent with solvent exposure<br>• Small $\Delta\omega_s$ → surface of apo base is like holo                                                                                                                                                                             |     |        | Leu 150 <sub>y</sub> | No Disp. | No Disp.    | No Disp. | • No dispersion → rigid or flexible with constant solvent exposure                                                                                                                                                                                                                                                                                                                                                                                                                                                                                                                                                        |         |                                                     |
| Leu 150 <sub>y</sub> | 24.1                                                         | 24.6                                   | (Same as above)               | (Same as above)                     | (Same as above)                               | Surface (S)          | (Same as above)                                                                 | (Same as above)                                                                            | 1%     | 3%   | (Same as above)                                                                                                                                                                                                                                                                                        |     |        | Leu 150 <sub>y</sub> | No Disp. | No Disp.    | No Disp. | (Same as above)                                                                                                                                                                                                                                                                                                                                                                                                                                                                                                                                                                                                           |         |                                                     |
| Val 19 <sub>y</sub>  | 0.0                                                          | 0.0                                    | Buried                        | Mid-protomer                        | To center                                     | Core (C)             | No apparent sources of $\Delta\delta_s$ nor $\Delta\omega_s$                    | Ile12, Val21, Leu38, Ala61                                                                 | 2%     | 10%  | • Small $\Delta\delta_s$ → consistent with lack of $\Delta\delta_s$ sources<br>• Small $\Delta\omega_s$ → this apo core is like holo                                                                                                                                                                   |     |        | Val 19 <sub>y</sub>  | No Disp. | No Disp.    | No Disp. | • No dispersion → core is likely rigid here since little/no adjustment required upon Trp-binding (small $\Delta\delta$ )                                                                                                                                                                                                                                                                                                                                                                                                                                                                                                  |         |                                                     |
| Val 19 <sub>y</sub>  | 0.0                                                          | 0.0                                    | (Same as above)               | (Same as above)                     | To surface                                    | Core (C)             | No apparent sources of $\Delta\delta_s$ nor $\Delta\omega_s$                    | Ala14, Glu16, Gly59                                                                        | 0%     | 8%   | (Same as above)                                                                                                                                                                                                                                                                                        |     |        | Val 19 <sub>y</sub>  | No Disp. | No Disp.    | No Disp. | (Same as above)                                                                                                                                                                                                                                                                                                                                                                                                                                                                                                                                                                                                           |         |                                                     |
| Val 21 <sub>y</sub>  | 6.1                                                          | 6.1                                    | Buried                        | Center (near interface)             | To core (Trp site)                            | Accessible Core (AC) | His33(Self) 9.3Å<br>His34(Self) 7.3Å<br>Trp ring 4.4Å                           | Val21, Ile12, Ile55, Val57 <sub>y</sub>                                                    | 6%     | 10%  | • Small $\Delta\delta_s$ and $\Delta\omega_s$ → this apo accessible core is like holo (near Trp!)<br>• Unexpected: small $\Delta\delta_s$ despite proximity to Trp ligand<br>• Small $\Delta\omega_s$ perhaps His 33/34 occupies Trp site in similar orientation as Trp to yield comparable ring shift |     |        | Val 21 <sub>y</sub>  | ?        | ?           | 42%      | • Moderate $k_{ex}$ → Moderate rate of motion at Trp site<br>• Structural location links Trp-site → RNA-site                                                                                                                                                                                                                                                                                                                                                                                                                                                                                                              |         |                                                     |
| Val 21 <sub>y</sub>  | 0.0                                                          | 0.0                                    | (Same as above)               | (Same as above)                     | To core edge                                  | Core (C)             | Glu36(Self) 7.3Å (too far?)<br>His34(Self) 8.4Å<br>Trp ring 7.3Å                | Ile120 <sub>y</sub> , Leu380 <sub>y</sub> , Leu440 <sub>y</sub>                            | 1%     | 28%  | • Modest $\Delta\delta_s$ → this apo core is unique (note: $\gamma_s$ reports holo-like core near Trp)                                                                                                                                                                                                 |     |        | Val 21 <sub>y</sub>  | ?        | ?           | > 0      | • Same as $\gamma_s$ except rate is unknown<br>• Structural location links Trp-site → RNA-site                                                                                                                                                                                                                                                                                                                                                                                                                                                                                                                            |         |                                                     |
| Ile 220 <sub>y</sub> | 5.5                                                          | 5.5                                    | Buried (protomer edge)        | Mid-protomer (near interface)       | To interface                                  | Accessible Core (AC) | Phe32(Self) 3.9Å (covers)                                                       | Arg58(Self)                                                                                | 70%    | 7%   | • Large $\Delta\delta_s$ → Phe32 alternate orientation in apo<br>• Small $\Delta\omega_s$ → edge of apo core is like holo                                                                                                                                                                              |     |        | Ile 220 <sub>y</sub> | 0%       | 100%        | 20%      | • Small $\Delta\omega_s$ → Phe32 ring is not affecting methyl (perhaps solvated?)<br>• Large $\Delta\omega_s$ → edge of protomer samples wide range of rotameric states<br>• Small $k_{ex}$ → rate of sampling is slow<br>• Ile220 <sub>y</sub> solvated and Phe32 flipped outward (?)<br>• Structural location links Trp-site → RNA-site<br>• Large $\Delta\omega_s$ → methyl samples unique orientation to Phe32<br>• Large $\Delta\omega_s$ → significant structural freedom at this core<br>• Small $k_{ex}$ → rate of exchange is slow<br>• Interface is very mobile here, at a slow rate ( $\delta_s$ corroborates) |         |                                                     |
| Leu 240 <sub>y</sub> | 0.0                                                          | 0.0                                    | Buried                        | Mid-protomer                        | To core                                       | Core (C)             | Phe32(Self) 4.1Å                                                                | Ile22 <sub>y</sub> , Phe32, Lys56                                                          | 46%    | 69%  | • Large $\Delta\delta_s$ → this apo core has unique orientation to Phe32<br>• Large $\Delta\omega_s$ → this apo core is unique<br>• Difference less pronounced toward interface (smaller $\Delta\delta_s$ for $\delta_s$ )                                                                             |     |        | Leu 240 <sub>y</sub> | 100%     | 68%         | 9%       | • Zero $\Delta\omega_s$ → unexpected despite proximity to Phe32 / His34<br>• $\Delta\omega_s$ $k_{ex}$ → corroborate hypotheses of $\delta_s$ methyl                                                                                                                                                                                                                                                                                                                                                                                                                                                                      |         |                                                     |
| Leu 240 <sub>y</sub> | 2.3                                                          | 27.0                                   | (Same as above)               | (Same as above)                     | To interface (closer to Trp than $\delta_s$ ) | Interface (I)        | Phe32(Self) 4.8Å<br>His34(Nbr) 4.8Å                                             | Thr30 <sub>y</sub> , Phe32                                                                 | 47%    | 31%  | • Large $\Delta\delta_s$ → this interface unique orientation to Phe32 and/or His34<br>• Modest $\Delta\omega_s$ → this apo interface is unique<br>• Difference more pronounced towards core (larger $\Delta\delta_s$ for $\delta_s$ )                                                                  |     |        | Leu 240 <sub>y</sub> | 0%       | 68%         | 0%       | • Small $k_{ex}$ → interface is very mobile here, at a slow rate ( $\delta_s$ corroborates)                                                                                                                                                                                                                                                                                                                                                                                                                                                                                                                               |         |                                                     |
| Ile 280 <sub>y</sub> | 72.7                                                         | 75.0                                   | Exposed                       | Interface                           | To solvent (?)                                | Trp-Loop (L)         | His51(Nbr) 3.9Å<br>Trp 9.7Å (quite far)                                         | Exposed (not packed)                                                                       | 41%    | 100% | • Modest $\Delta\delta_s$ → this apo loop has unique orientation to His51<br>• Large $\Delta\omega_s$ → this apo loop has unique packing (closes over empty Trp site?)                                                                                                                                 |     |        | Ile 280 <sub>y</sub> | 0%       | 93%         | 100%     | • Small $\Delta\omega_s$ → His51 not affecting methyl (perhaps Ile and/or His51 is solvated?)<br>• Large $\Delta\omega_s$ , $k_{ex}$ → loop rapidly sampling wide range of rotamers (perhaps Ile is solvated?)<br>• Good example for solvated Ile $\delta_s$ dynamics                                                                                                                                                                                                                                                                                                                                                     |         |                                                     |
| Leu 380 <sub>y</sub> | 0.0                                                          | 0.0                                    | Buried (protomer edge)        | Mid-protomer                        | To core                                       | Core (C)             | Glu36(Self) 7.0Å (too far/indirect)                                             | Val19 <sub>y</sub> , Val21 <sub>y</sub> , Leu44 <sub>y</sub>                               | 16%    | 6%   | • Unexpected: small/modest $\Delta\delta_s$ despite lack of sources of $\Delta\delta_s$<br>• Small $\Delta\omega_s$ → this apo core is like holo                                                                                                                                                       |     |        | Leu 380 <sub>y</sub> | No Disp. | No Disp.    | No Disp. | • No dispersion → core is likely rigid here since little/no adjustment required upon Trp-binding (small $\Delta\delta$ )                                                                                                                                                                                                                                                                                                                                                                                                                                                                                                  |         |                                                     |
| Leu 380 <sub>y</sub> | 0.0                                                          | 9.4                                    | (Same as above)               | Interface                           | To interface                                  | Interface (I)        | Lys56(Nbr) 4.5Å<br>Glu36(Self) 5.6Å                                             | Glu36, Leu440 <sub>y</sub> , Lys56                                                         | 14%    | 11%  | • Small $\Delta\delta_s$ → this apo interface is uniquely orientated to Lys56 and/or Glu36<br>• Small $\Delta\omega_s$ → this apo interface is like holo                                                                                                                                               |     |        | Leu 380 <sub>y</sub> | ?        | ?           | 28%      | • Small $k_{ex}$ → this interface has slow rate or motion                                                                                                                                                                                                                                                                                                                                                                                                                                                                                                                                                                 |         |                                                     |
| Val 43 <sub>y</sub>  | 0.0                                                          | 8.1                                    | Very buried                   | Interface (deeper than $\gamma_s$ ) | To interface                                  | Interface (I)        | No apparent sources of $\Delta\delta_s$ nor $\Delta\omega_s$                    | Val11 <sub>y</sub> , Ile45 <sub>y</sub>                                                    | 9%     | 9%   | • Small $\Delta\delta_s$ → consistent with lack of sources of $\Delta\delta_s$<br>• Small $\Delta\omega_s$ → this apo interface is like holo                                                                                                                                                           |     |        | Val 43 <sub>y</sub>  | No Disp. | No Disp.    | No Disp. | • No dispersion → interface likely rigid here since little/no adjustment required upon Trp-binding (small $\Delta\delta$ )                                                                                                                                                                                                                                                                                                                                                                                                                                                                                                |         |                                                     |
| Val 43 <sub>y</sub>  | 0.0                                                          | 29.4                                   | (Same as above)               | Interface                           | To interface                                  | Interface (I)        | (Same as above)                                                                 | Lys15, Ile700 <sub>y</sub> (Nbr)                                                           | 2%     | 6%   | (Same as above)                                                                                                                                                                                                                                                                                        |     |        | Val 43 <sub>y</sub>  | No Disp. | No Disp.    | No Disp. | • No dispersion → interface likely rigid here since little/no adjustment required upon Trp-binding (small $\Delta\delta$ )                                                                                                                                                                                                                                                                                                                                                                                                                                                                                                |         |                                                     |
| Leu 440 <sub>y</sub> | 0.0                                                          | 42.6                                   | Buried                        | Interface                           | To interface                                  | Interface (I)        | His 34(Self) 7.2Å<br>Trp ring 7.6Å                                              | Lys56(Nbr), Glu38, Ala54(Nbr), Leu340 <sub>y</sub> (Nbr)                                   | 55%    | 53%  | • Modest $\Delta\delta_s$ → Trp ligand ring current<br>• Modest $\Delta\omega_s$ → this apo interface is unique<br>• Adjacent Trp-site methyl is less altered (smaller $\Delta\delta_s$ for $\delta_s$ )                                                                                               |     |        | Leu 440 <sub>y</sub> | ?        | ?           | 35%      | • Small $k_{ex}$ → slow exchange rate at this interface                                                                                                                                                                                                                                                                                                                                                                                                                                                                                                                                                                   |         |                                                     |
| Leu 440 <sub>y</sub> | 4.1                                                          | 5.4                                    | (Same as above)               | (Same as above)                     | To core (Trp site)                            | Accessible Core (AC) | His 34(Self) 7.0Å<br>Trp ring 5.8Å                                              | Val21 <sub>y</sub> , Glu38, Ala46                                                          | 100%   | 18%  | • Large $\Delta\delta_s$ → Trp ligand ring current<br>• Small/modest $\Delta\omega_s$ → this apo Trp-pocket only slightly different than holo<br>• Adjacent interface methyl is more significantly altered (larger $\Delta\delta_s$ for $\delta_s$ )                                                   |     |        | Leu 440 <sub>y</sub> | ?        | ?           | > 0      | • Same as $\delta_s$ except unknown $k_{ex}$                                                                                                                                                                                                                                                                                                                                                                                                                                                                                                                                                                              |         |                                                     |
| Ile 450 <sub>y</sub> | 0.0                                                          | 65.3                                   | Very buried                   | Interface                           | To interface                                  | Interface (I)        | No apparent sources of $\Delta\delta_s$ nor $\Delta\omega_s$                    | Val59 <sub>y</sub> , Ile63 <sub>y</sub> , $\gamma_s$ all on Nbr                            | 1%     | 14%  | • Small $\Delta\delta_s$ → consistent with lack of sources of $\Delta\delta_s$<br>• Small/modest $\Delta\omega_s$ → this apo interface is slightly different than holo                                                                                                                                 |     |        | Ile 450 <sub>y</sub> | 0%       | 67%         | 47%      | • Zero $\Delta\omega_s$ → consistent with lack of sources of $\Delta\omega_s$<br>• Large $\Delta\omega_s$ and modest $k_{ex}$ → significant mobility at this interface                                                                                                                                                                                                                                                                                                                                                                                                                                                    |         |                                                     |
| Ile 550 <sub>y</sub> | 1.6                                                          | 1.6                                    | Very buried                   | Mid-protomer                        | To core                                       | Core (C)             | Phe48 4.3Å<br>Trp ring 3.8Å                                                     | Val10 <sub>y</sub> , Trp ligand                                                            | 19%    | 27%  | • Small/modest $\Delta\delta_s$ → Trp ligand ring current<br>• Modest $\Delta\omega_s$ → minor adjustment to pack against Trp ring                                                                                                                                                                     |     |        | Ile 550 <sub>y</sub> | ?        | ?           | 79%      | • Large $k_{ex}$ → center of core undergoing rapid exchange<br>• Structural location links Trp-site → RNA-site                                                                                                                                                                                                                                                                                                                                                                                                                                                                                                            |         |                                                     |
| Val 57 <sub>y</sub>  | 0.0                                                          | 0.0                                    | Buried                        | Mid-protomer                        | To core                                       | Core (C)             | No apparent sources of $\Delta\delta_s$ nor $\Delta\omega_s$                    | Ile12 <sub>y</sub> , Val19 <sub>y</sub> , Ala61 $\beta$                                    | 0%     | 16%  | • Small $\Delta\delta_s$ → consistent with lack of sources of $\Delta\delta_s$<br>• Small $\Delta\omega_s$ → this apo core is like holo                                                                                                                                                                |     |        | Val 57 <sub>y</sub>  | No Disp. | No Disp.    | No Disp. | • No dispersion → core is rigid here                                                                                                                                                                                                                                                                                                                                                                                                                                                                                                                                                                                      |         |                                                     |
| Val 57 <sub>y</sub>  | 0.0                                                          | 7.9                                    | (Same as above)               | Interface                           | (Same as above)                               | Interface (I)        | No apparent sources of $\Delta\delta_s$ nor $\Delta\omega_s$                    | Ile120 <sub>y</sub> , Ile450 <sub>y</sub> , Ile55 <sub>y</sub>                             | 1%     | 11%  | (Same as above)                                                                                                                                                                                                                                                                                        |     |        | Val 57 <sub>y</sub>  | No Disp. | No Disp.    | No Disp. | • No dispersion → core is rigid here                                                                                                                                                                                                                                                                                                                                                                                                                                                                                                                                                                                      |         |                                                     |
| Ile 630 <sub>y</sub> | 0.0                                                          | 10.3                                   | Buried                        | Interface                           | To interface                                  | Interface (I)        | No apparent sources of $\Delta\delta_s$ nor $\Delta\omega_s$                    | Val45 <sub>y</sub> , $\gamma_s$ , Ile450 <sub>y</sub> , Val57 <sub>y</sub> , Ser73 $\beta$ | 0%     | 4%   | • Small $\Delta\delta_s$ → consistent with lack of sources of $\Delta\delta_s$<br>• Small $\Delta\omega_s$ → this apo interface is like holo                                                                                                                                                           |     |        | Ile 630 <sub>y</sub> | ?        | ?           | 61%      | • Modest $k_{ex}$ → modest structural freedom at this interface (near base)                                                                                                                                                                                                                                                                                                                                                                                                                                                                                                                                               |         |                                                     |
| Val 69 <sub>y</sub>  | 21.4                                                         | 24.4                                   | Exposed                       | Mid-protomer (base at back)         | Along surface                                 | Surface (S)          | Tyr62 4.2Å                                                                      | Tyr62, Glu64<br>Relatively exposed                                                         | 8%     | 2%   | • Small $\Delta\delta_s$ → apo base slightly adjusted relative to Tyr62<br>• Small $\Delta\omega_s$ → surface of apo base is like holo                                                                                                                                                                 |     |        | Val 69 <sub>y</sub>  | No Disp. | No Disp.    | No Disp. | • No dispersion → flexible with constant solvent exposure (or rigid, which is less likely)                                                                                                                                                                                                                                                                                                                                                                                                                                                                                                                                |         |                                                     |
| Val 69 <sub>y</sub>  | 51.6                                                         | 51.6                                   | (Same as above)               | (Same as above)                     | To surface (unique $\gamma_s$ )               | Surface (S)          | Tyr62 4.5Å                                                                      | Exposed (not packed)                                                                       | 8%     | 0%   | (Same as above)                                                                                                                                                                                                                                                                                        |     |        | Val 69 <sub>y</sub>  | ?        | ?           | 47%      | • Moderate $k_{ex}$ → base mobility about the holo conformation (small $\Delta\delta$ )                                                                                                                                                                                                                                                                                                                                                                                                                                                                                                                                   |         |                                                     |
| Ile 700 <sub>y</sub> | 0.0                                                          | 72.4                                   | Buried near surface (at base) | Interface                           | To interface                                  | Interface (I)        | Tyr62(Nbr) 3.4Å                                                                 | Lys13, Tyr62(Nbr)<br>May be exposed in apo                                                 | 4%     | 5%   | • Small $\Delta\delta_s$ → apo base slightly adjusted relative to Tyr62<br>• Small $\Delta\omega_s$ → surface of apo base is like holo                                                                                                                                                                 |     |        | Ile 700 <sub>y</sub> | ?        | ?           | > 0      | • Non-zero $k_{ex}$ → base mobility about the holo conformation (small $\Delta\delta$ )                                                                                                                                                                                                                                                                                                                                                                                                                                                                                                                                   |         |                                                     |
