# Supplementary material
Source: PubMed Central journal article supplement (PMC3258336)
Supplement: NIHMS342704-supplement-03.pdf [file NIHMS342704-supplement-03.pdf]

Table S2\_Subtitle

Site-specific fit with site-specific  $\Delta\omega_{ij}$ ,  $\Delta\omega_{ij}$ ,  $P_{ij}$ ,  $k_{ij}$ , and  $R_{ij}^2$

| AA Num | Res | Atom     | Curveset Name  | Group Name                          | Curveset Num | Curve Num | $B_j$ (MHz) | Temp (°C) | Num of Curvesets | Num of Curves | Dataset Name | Exchange? | Best fit OK? * | DoF <sup>†</sup> (NoEx) | DoF (Ex+)  | $\chi^2$ (NoEx) | $\chi^2$ (Ex+) | $\chi^2$ Red <sup>†</sup> (NoEx) | $\chi^2$ Red (Ex+) | F <sup>†</sup> (Eq) | P(E <sup>†</sup> ) (For F-1) | $\Delta\omega_{ij}$ (ppm) | $\Delta\omega_{ij}$ (ppm) | $P_{ij}$ (%) | $k_{ij}$ (Hz) | $R_{ij}^2$ (%) | $R_{ij}$ (Hz) | $\alpha$ (°) | $k_{ij}$ (Hz) | $k_{ij}$ (Hz) |            |
|--------|-----|----------|----------------|-------------------------------------|--------------|-----------|-------------|-----------|------------------|---------------|--------------|-----------|----------------|-------------------------|------------|-----------------|----------------|----------------------------------|--------------------|---------------------|------------------------------|---------------------------|---------------------------|--------------|---------------|----------------|---------------|--------------|---------------|---------------|------------|
| 24     | Leu | -delta_1 | Leu 24-delta_1 | Leu 24-delta_1 + lie 28-delta_1_25C | 1            | 1         | 800.13      | 25.0      | 2                | 8             | 800-MQ-25C   | TRUE      | TRUE           | 72                      | 66         | 2576.46         | 83.23          | 35.78                            | 1.26               | 28.38               | 2.29e-31                     | 0.00,0.0                  | 1.360.1                   | 96.30.7      | 1760.44164.7  | 53.50.7        | 26.61.4       | 1.40.1       | 64.746.1      | 1695.7159.1   |            |
| 24     | Leu | -delta_1 | Leu 24-delta_1 | Leu 24-delta_1 + lie 28-delta_1_25C | 1            | 2         | 600.17      | 25.0      | 2                | 8             | 600-MQ-25C   | TRUE      | TRUE           | 72                      | 66         | 2576.46         | 83.23          | 35.78                            | 1.26               | 28.38               | 2.29e-31                     | 0.00,0.0                  | 1.360.1                   | 96.30.7      | 1760.44164.7  | 45.41.2        | 14.140.6      | 0.90.1       | 64.746.1      | 1695.7159.1   |            |
| 24     | Leu | -delta_1 | Leu 24-delta_1 | Leu 24-delta_1 + lie 28-delta_1_25C | 1            | 3         | 800.13      | 25.0      | 2                | 8             | 800-SQ-25C   | TRUE      | TRUE           | 72                      | 66         | 2576.46         | 83.23          | 35.78                            | 1.26               | 28.38               | 2.29e-31                     | 0.00,0.0                  | 1.360.1                   | 96.30.7      | 1760.44164.7  | 53.50.7        | 26.61.4       | 1.40.1       | 64.746.1      | 1695.7159.1   |            |
| 24     | Leu | -delta_1 | Leu 24-delta_1 | Leu 24-delta_1 + lie 28-delta_1_25C | 1            | 4         | 600.13      | 25.0      | 2                | 8             | 600-SQ-25C   | TRUE      | TRUE           | 72                      | 66         | 2576.46         | 83.23          | 35.78                            | 1.26               | 28.38               | 2.29e-31                     | 0.00,0.0                  | 1.360.1                   | 96.30.7      | 1760.44164.7  | 45.41.2        | 14.140.6      | 0.90.1       | 64.746.1      | 1695.7159.1   |            |
| 28     | Ile | -delta_1 | Ile 28-delta_1 | Leu 24-delta_1 + lie 28-delta_1_25C | 2            | 1         | 800.13      | 25.0      | 2                | 8             | 800-MQ-25C   | TRUE      | TRUE           | 72                      | 66         | 2576.46         | 83.23          | 35.78                            | 1.26               | 28.38               | 2.29e-31                     | 0.00,0.0                  | 1.260.1                   | 96.30.7      | 1760.44164.7  | 53.50.7        | 26.61.4       | 1.40.1       | 64.746.1      | 1695.7159.1   |            |
| 28     | Ile | -delta_1 | Ile 28-delta_1 | Leu 24-delta_1 + lie 28-delta_1_25C | 2            | 2         | 600.17      | 25.0      | 2                | 8             | 600-MQ-25C   | TRUE      | TRUE           | 72                      | 66         | 2576.46         | 83.23          | 35.78                            | 1.26               | 28.38               | 2.29e-31                     | 0.00,0.0                  | 1.260.1                   | 96.30.7      | 1760.44164.7  | 45.41.2        | 14.140.6      | 0.90.1       | 64.746.1      | 1695.7159.1   |            |
| 28     | Ile | -delta_1 | Ile 28-delta_1 | Leu 24-delta_1 + lie 28-delta_1_25C | 2            | 3         | 800.13      | 25.0      | 2                | 8             | 800-SQ-25C   | TRUE      | TRUE           | 72                      | 66         | 2576.46         | 83.23          | 35.78                            | 1.26               | 28.38               | 2.29e-31                     | 0.00,0.0                  | 1.260.1                   | 96.30.7      | 1760.44164.7  | 53.50.7        | 26.61.4       | 1.40.1       | 64.746.1      | 1695.7159.1   |            |
| 28     | Ile | -delta_1 | Ile 28-delta_1 | Leu 24-delta_1 + lie 28-delta_1_25C | 2            | 4         | 600.13      | 25.0      | 2                | 8             | 600-SQ-25C   | TRUE      | TRUE           | 72                      | 66         | 2576.46         | 83.23          | 35.78                            | 1.26               | 28.38               | 2.29e-31                     | 0.00,0.0                  | 1.260.1                   | 96.30.7      | 1760.44164.7  | 45.41.2        | 14.140.6      | 0.90.1       | 64.746.1      | 1695.7159.1   |            |
| 24     | Leu | -delta_2 | Leu 24-delta_2 | Leu 24-delta_2 + lie 28-delta_1_25C | 1            | 1         | 800.13      | 25.0      | 2                | 8             | 800-MQ-25C   | TRUE      | TRUE           | 72                      | 66         | 9550.15         | 302.45         | 132.64                           | 4.58               | 28.94               | 1.22e-31                     | Param Not OK              | Param Not OK              | Param Not OK | 1399.24144.7  | 58.52.6        | 35.245.1      | 1.90.1       | Param Not OK  | Param Not OK  |            |
| 24     | Leu | -delta_2 | Leu 24-delta_2 | Leu 24-delta_2 + lie 28-delta_1_25C | 1            | 2         | 600.17      | 25.0      | 2                | 8             | 600-MQ-25C   | TRUE      | TRUE           | 72                      | 66         | 9550.15         | 302.45         | 132.64                           | 4.58               | 28.94               | 1.22e-31                     | Param Not OK              | Param Not OK              | Param Not OK | 1399.24144.7  | 45.312.1       | 18.941.8      | 1.50.5       | Param Not OK  | Param Not OK  |            |
| 24     | Leu | -delta_2 | Leu 24-delta_2 | Leu 24-delta_2 + lie 28-delta_1_25C | 1            | 3         | 800.13      | 25.0      | 2                | 8             | 800-SQ-25C   | TRUE      | TRUE           | 72                      | 66         | 9550.15         | 302.45         | 132.64                           | 4.58               | 28.94               | 1.22e-31                     | Param Not OK              | Param Not OK              | Param Not OK | 1399.24144.7  | 58.52.6        | 35.245.1      | 1.90.1       | Param Not OK  | Param Not OK  |            |
| 24     | Leu | -delta_2 | Leu 24-delta_2 | Leu 24-delta_2 + lie 28-delta_1_25C | 1            | 4         | 600.13      | 25.0      | 2                | 8             | 600-SQ-25C   | TRUE      | TRUE           | 72                      | 66         | 9550.15         | 302.45         | 132.64                           | 4.58               | 28.94               | 1.22e-31                     | Param Not OK              | Param Not OK              | Param Not OK | 1399.24144.7  | 48.811.9       | 20.443.3      | 1.90.1       | Param Not OK  | Param Not OK  |            |
| 28     | Ile | -delta_1 | Ile 28-delta_1 | Leu 24-delta_2 + lie 28-delta_1_25C | 2            | 1         | 800.13      | 25.0      | 2                | 8             | 800-MQ-25C   | TRUE      | TRUE           | 72                      | 66         | 9550.15         | 302.45         | 132.64                           | 4.58               | 28.94               | 1.22e-31                     | Param Not OK              | Param Not OK              | Param Not OK | 1399.24144.7  | 58.52.6        | 35.245.1      | 1.90.1       | Param Not OK  | Param Not OK  |            |
| 28     | Ile | -delta_1 | Ile 28-delta_1 | Leu 24-delta_2 + lie 28-delta_1_25C | 2            | 2         | 600.17      | 25.0      | 2                | 8             | 600-MQ-25C   | TRUE      | TRUE           | 72                      | 66         | 9550.15         | 302.45         | 132.64                           | 4.58               | 28.94               | 1.22e-31                     | Param Not OK              | Param Not OK              | Param Not OK | 1399.24144.7  | 45.312.1       | 18.941.8      | 1.50.5       | Param Not OK  | Param Not OK  |            |
| 28     | Ile | -delta_1 | Ile 28-delta_1 | Leu 24-delta_2 + lie 28-delta_1_25C | 2            | 3         | 800.13      | 25.0      | 2                | 8             | 800-SQ-25C   | TRUE      | TRUE           | 72                      | 66         | 9550.15         | 302.45         | 132.64                           | 4.58               | 28.94               | 1.22e-31                     | Param Not OK              | Param Not OK              | Param Not OK | 1399.24144.7  | 58.52.6        | 35.245.1      | 1.90.1       | Param Not OK  | Param Not OK  |            |
| 28     | Ile | -delta_1 | Ile 28-delta_1 | Leu 24-delta_2 + lie 28-delta_1_25C | 2            | 4         | 600.13      | 25.0      | 2                | 8             | 600-SQ-25C   | TRUE      | TRUE           | 72                      | 66         | 9550.15         | 302.45         | 132.64                           | 4.58               | 28.94               | 1.22e-31                     | Param Not OK              | Param Not OK              | Param Not OK | 1399.24144.7  | 48.811.9       | 20.443.3      | 1.90.1       | Param Not OK  | Param Not OK  |            |
| 10     | Val | -gamma_1 | Val 10-gamma_1 | Val 10-gamma_1_25C                  | 1            | 1         | 800.13      | 25.0      | 1                | 4             | 800-MQ-25C   | TRUE      | FALSE          | Fit Not OK              | Fit Not OK | Fit Not OK      | Fit Not OK     | Fit Not OK                       | Fit Not OK         | Fit Not OK          | Fit Not OK                   | Fit Not OK                | Fit Not OK                | Fit Not OK   | Fit Not OK    | Fit Not OK     | Fit Not OK    | Fit Not OK   | Fit Not OK    | Fit Not OK    | Fit Not OK |
| 10     | Val | -gamma_1 | Val 10-gamma_1 | Val 10-gamma_1_25C                  | 1            | 2         | 600.17      | 25.0      | 1                | 4             | 600-MQ-25C   | TRUE      | FALSE          | Fit Not OK              | Fit Not OK | Fit Not OK      | Fit Not OK     | Fit Not OK                       | Fit Not OK         | Fit Not OK          | Fit Not OK                   | Fit Not OK                | Fit Not OK                | Fit Not OK   | Fit Not OK    | Fit Not OK     | Fit Not OK    | Fit Not OK   | Fit Not OK    | Fit Not OK    | Fit Not OK |
| 10     | Val | -gamma_1 | Val 10-gamma_1 | Val 10-gamma_1_25C                  | 1            | 3         | 800.13      | 25.0      | 1                | 4             | 800-SQ-25C   | TRUE      | FALSE          | Fit Not OK              | Fit Not OK | Fit Not OK      | Fit Not OK     | Fit Not OK                       | Fit Not OK         | Fit Not OK          | Fit Not OK                   | Fit Not OK                | Fit Not OK                | Fit Not OK   | Fit Not OK    | Fit Not OK     | Fit Not OK    | Fit Not OK   | Fit Not OK    | Fit Not OK    | Fit Not OK |
| 10     | Val | -gamma_1 | Val 10-gamma_1 | Val 10-gamma_1_25C                  | 1            | 4         | 600.13      | 25.0      | 1                | 4             | 600-SQ-25C   | TRUE      | FALSE          | Fit Not OK              | Fit Not OK | Fit Not OK      | Fit Not OK     | Fit Not OK                       | Fit Not OK         | Fit Not OK          | Fit Not OK                   | Fit Not OK                | Fit Not OK                | Fit Not OK   | Fit Not OK    | Fit Not OK     | Fit Not OK    | Fit Not OK   | Fit Not OK    | Fit Not OK    | Fit Not OK |
| 10     | Val | -gamma_2 | Val 10-gamma_2 | Val 10-gamma_2_25C                  | 1            | 1         | 800.13      | 25.0      | 1                | 4             | 800-MQ-25C   | TRUE      | TRUE           | 36                      | 32         | 498.44          | 210.57         | 13.85                            | 6.58               | 2.10                | 5.72e-02                     | Param Not OK              | Param Not OK              | Param Not OK | 1590.5780.2   | 74.6111.8      | 34.112.8      | 2.00.5       | Param Not OK  | Param Not OK  |            |
| 10     | Val | -gamma_2 | Val 10-gamma_2 | Val 10-gamma_2_25C                  | 1            | 2         | 600.17      | 25.0      | 1                | 4             | 600-MQ-25C   | TRUE      | TRUE           | 36                      | 32         | 498.44          | 210.57         | 13.85                            | 6.58               | 2.10                | 5.72e-02                     | Param Not OK              | Param Not OK              | Param Not OK | 1590.5780.2   | 58.824.8       | 19.643.6      | 1.247        | Param Not OK  | Param Not OK  |            |
| 10     | Val | -gamma_2 | Val 10-gamma_2 | Val 10-gamma_2_25C                  | 1            | 3         | 800.13      | 25.0      | 1                | 4             | 800-SQ-25C   | TRUE      | TRUE           | 36                      | 32         | 498.44          | 210.57         | 13.85                            | 6.58               | 2.10                | 5.72e-02                     | Param Not OK              | Param Not OK              | Param Not OK | 1590.5780.2   | 74.6111.8      | 34.112.8      | 2.00.5       | Param Not OK  | Param Not OK  |            |
| 10     | Val | -gamma_2 | Val 10-gamma_2 | Val 10-gamma_2_25C                  | 1            | 4         | 600.13      | 25.0      | 1                | 4             | 600-SQ-25C   | TRUE      | TRUE           | 36                      | 32         | 498.44          | 210.57         | 13.85                            | 6.58               | 2.10                | 5.72e-02                     | Param Not OK              | Param Not OK              | Param Not OK | 1590.5780.2   | 67.810.4       | 18.110.2      | 2.00.5       | Param Not OK  | Param Not OK  |            |
| 11     | Val | -gamma_1 | Val 11-gamma_1 | Val 11-gamma_1_25C                  | 1            | 1         | 800.13      | 25.0      | 1                | 4             | 800-MQ-25C   | FALSE     | TRUE           | 36                      | No Exch    | 107.32          | No Exch        | 2.98                             | No Exch            | No Exch             | No Exch                      | 0.00,0                    | 0.00,0                    | 100.00,0     | 0.00,0        | 62.00,0        | 0.00,0        | 70.0         | 0.00,0        | 0.00,0        |            |
| 11     | Val | -gamma_1 | Val 11-gamma_1 | Val 11-gamma_1_25C                  | 1            | 2         | 600.17      | 25.0      | 1                | 4             | 600-MQ-25C   | FALSE     | TRUE           | 36                      | No Exch    | 107.32          | No Exch        | 2.98                             | No Exch            | No Exch             | No Exch                      | 0.00,0                    | 0.00,0                    | 100.00,0     | 0.00,0        | 62.00,0        | 0.00,0        | 70.0         | 0.00,0        | 0.00,0        |            |
| 11     | Val | -gamma_1 | Val 11-gamma_1 | Val 11-gamma_1_25C                  | 1            | 3         | 800.13      | 25.0      | 1                | 4             | 800-SQ-25C   | FALSE     | TRUE           | 36                      | No Exch    | 107.32          | No Exch        | 2.98                             | No Exch            | No Exch             | No Exch                      | 0.00,0                    | 0.00,0                    | 100.00,0     | 0.00,0        | 62.00,0        | 0.00,0        | 70.0         | 0.00,0        | 0.00,0        |            |
| 11     | Val | -gamma_1 | Val 11-gamma_1 | Val 11-gamma_1_25C                  | 1            | 4         | 600.13      | 25.0      | 1                | 4             | 600-SQ-25C   | FALSE     | TRUE           | 36                      | No Exch    | 107.32          | No Exch        | 2.98                             | No Exch            | No Exch             | No Exch                      | 0.00,0                    | 0.00,0                    | 100.00,0     | 0.00,0        | 60.80,0        | 0.00,0        | 70.0         | 0.00,0        | 0.00,0        |            |
| 11     | Val | -gamma_2 | Val 11-gamma_2 | Val 11-gamma_2_25C                  | 1            | 1         | 800.13      | 25.0      | 1                | 3             | 800-MQ-25C   | FALSE     | FALSE          | Fit Not OK              | Fit Not OK | Fit Not OK      | Fit Not OK     | Fit Not OK                       | Fit Not OK         | Fit Not OK          | Fit Not OK                   | Fit Not OK                | Fit Not OK                | Fit Not OK   | Fit Not OK    | Fit Not OK     | Fit Not OK    | Fit Not OK   | Fit Not OK    | Fit Not OK    |            |
| 11     | Val | -gamma_2 | Val 11-gamma_2 | Val 11-gamma_2_25C                  | 1            | 2         | 600.17      | 25.0      | 1                | 3             | 600-MQ-25C   | FALSE     | FALSE          | Fit Not OK              | Fit Not OK | Fit Not OK      | Fit Not OK     | Fit Not OK                       | Fit Not OK         | Fit Not OK          | Fit Not OK                   | Fit Not OK                | Fit Not OK                | Fit Not OK   | Fit Not OK    | Fit Not OK     | Fit Not OK    | Fit Not OK   | Fit Not OK    | Fit Not OK    |            |
| 11     | Val | -gamma_2 | Val 11-gamma_2 | Val 11-gamma_2_25C                  | 1            | 3         | 800.13      | 25.0      | 1                | 3             | 800-SQ-25C   | FALSE     | FALSE          | Fit Not OK              | Fit Not OK | Fit Not OK      | Fit Not OK     | Fit Not OK                       | Fit Not OK         | Fit Not OK          | Fit Not OK                   | Fit Not OK                | Fit Not OK                | Fit Not OK   | Fit Not OK    | Fit Not OK     | Fit Not OK    | Fit Not OK   | Fit Not OK    | Fit Not OK    |            |
| 12     | Ile | -delta_1 | Ile 12-delta_1 | Ile 12-delta_1_25C                  | 1            | 1         | 800.13      | 25.0      | 1                | 4             | 800-MQ-25C   | TRUE      | TRUE           | 36                      | 32         | 2215.39         | 62.67          | 61.54                            | 1.96               | 31.42               | 3.87e-17                     | Param Not OK              | Param Not OK              | Param Not OK | 1775.8139.1   | 58.822.2       | 37.811.8      | 2.00.0       | Param Not OK  | Param Not OK  |            |
| 12     | Ile | -delta_1 | Ile 12-delta_1 | Ile 12-delta_1_25C                  | 1            | 2         | 600.17      | 25.0      | 1                | 4             | 600-MQ-25C   | TRUE      | TRUE           | 36                      | 32         | 2215.39         | 62.67          | 61.54                            | 1.96               | 31.42               | 3.87e-17                     | Param Not OK              | Param Not OK              | Param Not OK | 1775.8139.1   | 29.014.7       | 23.10.8       | 1.90.2       | Param Not OK  | Param Not OK  |            |
| 12     | Ile | -delta_1 | Ile 12-delta_1 | Ile 12-delta_1_25C                  | 1            | 3         | 800.13      | 25.0      | 1                | 4             | 800-SQ-25C   | TRUE      | TRUE           | 36                      | 32         | 2215.39         | 62.67          | 61.54                            | 1.96               | 31.42               | 3.87e-17                     | Param Not OK              | Param Not OK              | Param Not OK | 1775.8139.1   | 58.822.5       | 37.811.8      | 2.00.0       | Param Not OK  | Param Not OK  |            |
| 12     | Ile | -delta_1 | Ile 12-delta_1 | Ile 12-delta_1_25C                  | 1            | 4         | 600.13      | 25.0      | 1                | 4             | 600-SQ-25C   | TRUE      | TRUE           | 36                      | 32         | 2215.39         | 62.67          | 61.54                            | 1.96               | 31.42               | 3.87e-17                     | Param Not OK              | Param Not OK              | Param Not OK | 1775.8139.1   | 52.622.6       | 21.210.1      | 2.00.0       | Param Not OK  | Param Not OK  |            |
| 15     | Leu | -delta_1 | Leu 15-delta_1 | Leu 15-delta_1_25C                  | 1            | 1         | 800.13      | 25.0      | 1                | 4             | 800-MQ-25C   | FALSE     | TRUE           | 36                      | No Exch    | 59.91           | No Exch        | 1.66                             | No Exch            | No Exch             | No Exch                      | 0.00,0                    | 0.00,0                    | 100.00,0     | 0.00,0        | 55.40,0        | 0.00,0        | 70.0         | 0.00,0        | 0.00,0        |            |
| 15     | Leu | -delta_1 | Leu 15-delta_1 | Leu 15-delta_1_25C                  | 1            | 2         | 600.17      | 25.0      | 1                | 4             | 600-MQ-25C   | FALSE     | TRUE           | 36                      | No Exch    | 59.91           | No Exch        | 1.66                             | No Exch            | No Exch             | No Exch                      | 0.00,0                    | 0.00,0                    | 100.00,0     | 0.00,0        | 58.00,0        | 0.00,0        | 70.0         | 0.00,0        | 0.00,0        |            |
| 15     | Leu | -delta_1 | Leu 15-delta_1 | Leu 15-delta_1_25C                  | 1            | 3         | 800.13      | 25.0      | 1                | 4             | 800-SQ-25C   | FALSE     | TRUE           | 36                      | No Exch    | 59.91           | No Exch        | 1.66                             | No Exch            | No Exch             | No Exch                      | 0.00,0                    | 0.00,0                    | 100.00,0     | 0.00,0        | 55.40,0        | 0.00,0        | 70.0         | 0.00,0        | 0.00,0        |            |
| 15     | Leu | -delta_1 | Leu 15-delta_1 | Leu 15-delta_1_25C                  | 1            | 4         | 600.13      | 25.0      | 1                | 4             | 600-SQ-25C   | FALSE     | TRUE           | 36                      | No Exch    | 59.91           | No Exch        | 1.66                             | No Exch            | No Exch             | No Exch                      | 0.00,0                    | 0.00,0                    | 100.00,0     | 0.00,0        | 48.90,0        | 0.00,0        | 70.0         | 0.00,0        | 0.00,0        |            |
| 15     | Leu | -delta_2 | Leu 15-delta_2 | Leu 15-delta_2_25C                  | 1            | 1         | 800.13      | 25.0      |                  |               |              |           |                |                         |            |                 |                |                                  |                    |                     |                              |                           |                           |              |               |                |               |              |               |               |            |

Table S2\_Subtilis

| AA Num | Res | Atom     | Curvest Name       | Group Name         | Curvest Num | Curve Num | B <sub>1</sub> (MHz) | Temp (C) | Num of Curvests | Num of Curves | Dataset Name | Exchange? | Best fit OK? | Def <sup>1</sup> (NOE) | Def <sup>1</sup> (Ex) | X <sup>1</sup> (NOE) | X <sup>1</sup> (Ex) | r <sup>2</sup> (NOE) | r <sup>2</sup> (Ex) | F <sup>1</sup> (Ex) | F <sup>1</sup> (NOE) | Δ <sub>NOE</sub> (ppm) | Δ <sub>Ex</sub> (ppm) | P <sub>1</sub> (%) | k <sub>ex</sub> (s) | R <sub>1</sub> <sup>ρ</sup> (Hz) | R <sub>2</sub> <sup>ρ</sup> (Hz) | α (°)      | k <sub>1</sub> (s) | k <sub>2</sub> (s) |            |            |
|--------|-----|----------|--------------------|--------------------|-------------|-----------|----------------------|----------|-----------------|---------------|--------------|-----------|--------------|------------------------|-----------------------|----------------------|---------------------|----------------------|---------------------|---------------------|----------------------|------------------------|-----------------------|--------------------|---------------------|----------------------------------|----------------------------------|------------|--------------------|--------------------|------------|------------|
| 22     | lle | -delta_1 | lle 22-delta_1     | lle 22-delta_1_25C | 1           | 1         | 800.13               | 25.0     | 1               | 4             | 800-MQ-25C   | TRUE      | TRUE         | 36                     | 32                    | 325.59               | 17.73               | 9.04                 | 0.55                | 16.32               | 1.13e-12             | 0.040.0                | 1.5e0.2               | 98.680.6           | 1315.53272.8        | 45.740.5                         | 12.040.1                         | 0.840.3    | 18.444.6           | 1297.14323.3       |            |            |
| 22     | lle | -delta_1 | lle 22-delta_1     | lle 22-delta_1_25C | 1           | 2         | 600.17               | 25.0     | 1               | 4             | 800-MQ-25C   | TRUE      | TRUE         | 36                     | 32                    | 325.59               | 17.73               | 9.04                 | 0.55                | 16.32               | 1.13e-12             | 0.040.0                | 1.5e0.2               | 98.680.6           | 1315.53272.8        | 40.840.4                         | 9.840.4                          | 0.840.3    | 18.444.6           | 1297.14323.3       |            |            |
| 22     | lle | -delta_1 | lle 22-delta_1     | lle 22-delta_1_25C | 1           | 3         | 800.13               | 25.0     | 1               | 4             | 800-SQ-25C   | TRUE      | TRUE         | 36                     | 32                    | 325.59               | 17.73               | 9.04                 | 0.55                | 16.32               | 1.13e-12             | 0.040.0                | 1.5e0.2               | 98.680.6           | 1315.53272.8        | 39.540.3                         | 8.440.5                          | 0.840.3    | 18.444.6           | 1297.14323.3       |            |            |
| 22     | lle | -delta_1 | lle 22-delta_1     | lle 22-delta_1_25C | 1           | 4         | 600.13               | 25.0     | 1               | 4             | 800-SQ-25C   | TRUE      | TRUE         | 36                     | 32                    | 325.59               | 17.73               | 9.04                 | 0.55                | 16.32               | 1.13e-12             | 0.040.0                | 1.5e0.2               | 98.680.6           | 1315.53272.8        | 39.540.3                         | 8.440.5                          | 0.840.3    | 18.444.6           | 1297.14323.3       |            |            |
| 24     | Leu | -delta_1 | Leu 24-delta_1     | Leu 24-delta_1_25C | 1           | 1         | 800.13               | 25.0     | 1               | 4             | 800-MQ-25C   | TRUE      | TRUE         | 36                     | 32                    | 1058.52              | 33.02               | 29.40                | 1.03                | 28.49               | 1.86e-16             | 0.140.0                | 1.0e0.2               | 95.543.4           | 1161.32171.6        | 55.440.5                         | 27.741.5                         | 1.140.3    | 51.949.9           | 1109.4211.6        |            |            |
| 24     | Leu | -delta_1 | Leu 24-delta_1     | Leu 24-delta_1_25C | 1           | 2         | 600.17               | 25.0     | 1               | 4             | 800-MQ-25C   | TRUE      | TRUE         | 36                     | 32                    | 1058.52              | 33.02               | 29.40                | 1.03                | 28.49               | 1.86e-16             | 0.140.0                | 1.0e0.2               | 95.543.4           | 1161.32171.6        | 46.145.9                         | 14.940.8                         | 0.740.2    | 51.949.9           | 1109.4211.6        |            |            |
| 24     | Leu | -delta_1 | Leu 24-delta_1     | Leu 24-delta_1_25C | 1           | 3         | 800.13               | 25.0     | 1               | 4             | 800-SQ-25C   | TRUE      | TRUE         | 36                     | 32                    | 1058.52              | 33.02               | 29.40                | 1.03                | 28.49               | 1.86e-16             | 0.140.0                | 1.0e0.2               | 95.543.4           | 1161.32171.6        | 55.440.5                         | 27.741.5                         | 1.140.3    | 51.949.9           | 1109.4211.6        |            |            |
| 24     | Leu | -delta_1 | Leu 24-delta_1     | Leu 24-delta_1_25C | 1           | 4         | 600.13               | 25.0     | 1               | 4             | 800-SQ-25C   | TRUE      | TRUE         | 36                     | 32                    | 1058.52              | 33.02               | 29.40                | 1.03                | 28.49               | 1.86e-16             | 0.140.0                | 1.0e0.2               | 95.543.4           | 1161.32171.6        | 46.270.4                         | 13.941.1                         | 1.140.3    | 51.949.9           | 1109.4211.6        |            |            |
| 24     | Leu | -delta_2 | Co(Leu 24-delta_2) | Leu 24-delta_2_25C | 1           | 1         | 800.13               | 25.0     | 1               | 4             | 800-MQ-25C   | TRUE      | TRUE         | 36                     | 32                    | 8032.21              | 145.29              | 223.12               | 4.54                | 49.14               | 2.71e-20             | 0.040.0                | 1.0e0.1               | 87.342.5           | 1046.8103.6         | 61.641.9                         | 83.347.1                         | 1.140.2    | 133.0413.7         | 913.8494.0         |            |            |
| 24     | Leu | -delta_2 | Co(Leu 24-delta_2) | Leu 24-delta_2_25C | 1           | 2         | 600.17               | 25.0     | 1               | 4             | 800-MQ-25C   | TRUE      | TRUE         | 36                     | 32                    | 8032.21              | 145.29              | 223.12               | 4.54                | 49.14               | 2.71e-20             | 0.040.0                | 1.0e0.1               | 87.342.5           | 1046.8103.6         | 58.043.3                         | 61.646.5                         | 1.147      | 133.0413.7         | 913.8494.0         |            |            |
| 24     | Leu | -delta_2 | Co(Leu 24-delta_2) | Leu 24-delta_2_25C | 1           | 3         | 800.13               | 25.0     | 1               | 4             | 800-SQ-25C   | TRUE      | TRUE         | 36                     | 32                    | 8032.21              | 145.29              | 223.12               | 4.54                | 49.14               | 2.71e-20             | 0.040.0                | 1.0e0.1               | 87.342.5           | 1046.8103.6         | 61.641.9                         | 83.347.1                         | 1.140.2    | 133.0413.7         | 913.8494.0         |            |            |
| 24     | Leu | -delta_2 | Co(Leu 24-delta_2) | Leu 24-delta_2_25C | 1           | 4         | 600.13               | 25.0     | 1               | 4             | 800-SQ-25C   | TRUE      | TRUE         | 36                     | 32                    | 8032.21              | 145.29              | 223.12               | 4.54                | 49.14               | 2.71e-20             | 0.040.0                | 1.0e0.1               | 87.342.5           | 1046.8103.6         | 51.040.9                         | 61.542.5                         | 1.140.2    | 133.0413.7         | 913.8494.0         |            |            |
| 28     | lle | -delta_1 | Co(Lle 28-delta_1) | lle 28-delta_1_25C | 1           | 1         | 800.13               | 25.0     | 1               | 4             | 800-MQ-25C   | TRUE      | TRUE         | 36                     | 32                    | 1517.94              | 24.11               | 42.17                | 0.75                | 55.96               | 3.20e-21             | 0.040.0                | 1.4e0.2               | 96.342.3           | 2391.8237.6         | 52.341.0                         | 29.741.4                         | 1.540.2    | 88.349.0           | 2303.5423.3        |            |            |
| 28     | lle | -delta_1 | Co(Lle 28-delta_1) | lle 28-delta_1_25C | 1           | 2         | 600.17               | 25.0     | 1               | 4             | 800-MQ-25C   | TRUE      | TRUE         | 36                     | 32                    | 1517.94              | 24.11               | 42.17                | 0.75                | 55.96               | 3.20e-21             | 0.040.0                | 1.4e0.2               | 96.342.3           | 2391.8237.6         | 48.542.9                         | 19.440.5                         | 1.547      | 88.349.0           | 2303.5423.3        |            |            |
| 28     | lle | -delta_1 | Co(Lle 28-delta_1) | lle 28-delta_1_25C | 1           | 3         | 800.13               | 25.0     | 1               | 4             | 800-SQ-25C   | TRUE      | TRUE         | 36                     | 32                    | 1517.94              | 24.11               | 42.17                | 0.75                | 55.96               | 3.20e-21             | 0.040.0                | 1.4e0.2               | 96.342.3           | 2391.8237.6         | 52.341.0                         | 29.741.4                         | 1.540.2    | 88.349.0           | 2303.5423.3        |            |            |
| 28     | lle | -delta_1 | Co(Lle 28-delta_1) | lle 28-delta_1_25C | 1           | 4         | 600.13               | 25.0     | 1               | 4             | 800-SQ-25C   | TRUE      | TRUE         | 36                     | 32                    | 1517.94              | 24.11               | 42.17                | 0.75                | 55.96               | 3.20e-21             | 0.040.0                | 1.4e0.2               | 96.342.3           | 2391.8237.6         | 44.440.8                         | 19.340.5                         | 1.540.2    | 88.349.0           | 2303.5423.3        |            |            |
| 38     | Leu | -delta_1 | Leu 38-delta_1     | Leu 38-delta_1_25C | 1           | 1         | 800.13               | 25.0     | 1               | 4             | 800-MQ-25C   | FALSE     | TRUE         | 36                     | No Exch               | 20.19                | No Exch             | 0.56                 | No Exch             | No Exch             | No Exch              | 0.040.0                | 0.040.0               | 100.00.0           | 0.040.0             | 47.740.0                         | 0.047                            | 740.0      | 0.047              | 0.047              | 0.047      |            |
| 38     | Leu | -delta_1 | Leu 38-delta_1     | Leu 38-delta_1_25C | 1           | 2         | 600.17               | 25.0     | 1               | 4             | 800-MQ-25C   | FALSE     | TRUE         | 36                     | No Exch               | 20.19                | No Exch             | 0.56                 | No Exch             | No Exch             | No Exch              | 0.040.0                | 0.040.0               | 100.00.0           | 0.040.0             | 46.840.0                         | 0.047                            | 740.0      | 0.047              | 0.047              | 0.047      |            |
| 38     | Leu | -delta_1 | Leu 38-delta_1     | Leu 38-delta_1_25C | 1           | 3         | 800.13               | 25.0     | 1               | 4             | 800-SQ-25C   | FALSE     | TRUE         | 36                     | No Exch               | 20.19                | No Exch             | 0.56                 | No Exch             | No Exch             | No Exch              | 0.040.0                | 0.040.0               | 100.00.0           | 0.040.0             | 47.740.0                         | 0.047                            | 740.0      | 0.047              | 0.047              | 0.047      |            |
| 38     | Leu | -delta_1 | Leu 38-delta_1     | Leu 38-delta_1_25C | 1           | 4         | 600.13               | 25.0     | 1               | 4             | 800-SQ-25C   | FALSE     | TRUE         | 36                     | No Exch               | 20.19                | No Exch             | 0.56                 | No Exch             | No Exch             | No Exch              | 0.040.0                | 0.040.0               | 100.00.0           | 0.040.0             | 43.740.0                         | 0.047                            | 740.0      | 0.047              | 0.047              | 0.047      |            |
| 38     | Leu | -delta_2 | Leu 38-delta_2     | Leu 38-delta_2_25C | 1           | 1         | 800.13               | 25.0     | 1               | 3             | 800-MQ-25C   | TRUE      | TRUE         | 36                     | 23                    | 74.65                | 5.86                | 2.07                 | 0.25                | 8.14                | 9.96e-07             | Param Not OK           | Param Not OK          | Param Not OK       | 1423.5216.2         | 51.043.5                         | 7.040.7                          | 7?7        | Param Not OK       | Param Not OK       |            |            |
| 38     | Leu | -delta_2 | Leu 38-delta_2     | Leu 38-delta_2_25C | 1           | 2         | 600.17               | 25.0     | 1               | 3             | 800-MQ-25C   | TRUE      | TRUE         | 36                     | 23                    | 74.65                | 5.86                | 2.07                 | 0.25                | 8.14                | 9.96e-07             | Param Not OK           | Param Not OK          | Param Not OK       | 1423.5216.2         | 19.247.5                         | 4.540.4                          | 2.240.3    | Param Not OK       | Param Not OK       |            |            |
| 38     | Leu | -delta_2 | Leu 38-delta_2     | Leu 38-delta_2_25C | 1           | 3         | 800.13               | 25.0     | 1               | 3             | 800-SQ-25C   | TRUE      | TRUE         | 36                     | 23                    | 74.65                | 5.86                | 2.07                 | 0.25                | 8.14                | 9.96e-07             | Param Not OK           | Param Not OK          | Param Not OK       | 1423.5216.2         | 51.043.5                         | 7.040.7                          | 7?7        | Param Not OK       | Param Not OK       |            |            |
| 43     | Val | -gamma_1 | Val 43-gamma_1     | Val 43-gamma_1_25C | 1           | 1         | 800.13               | 25.0     | 1               | 2             | 800-MQ-25C   | FALSE     | TRUE         | 18                     | No Exch               | 117.93               | No Exch             | 6.55                 | No Exch             | No Exch             | No Exch              | 0.040.0                | 0.040.0               | 100.00.0           | 0.040.0             | 60.340.0                         | 0.047                            | 740.0      | 0.047              | 0.047              | 0.047      |            |
| 43     | Val | -gamma_1 | Val 43-gamma_1     | Val 43-gamma_1_25C | 1           | 2         | 600.17               | 25.0     | 1               | 2             | 800-SQ-25C   | FALSE     | TRUE         | 18                     | No Exch               | 117.93               | No Exch             | 6.55                 | No Exch             | No Exch             | No Exch              | 0.040.0                | 0.040.0               | 100.00.0           | 0.040.0             | 60.340.0                         | 0.047                            | 740.0      | 0.047              | 0.047              | 0.047      |            |
| 43     | Val | -gamma_2 | Val 43-gamma_2     | Val 43-gamma_2_25C | 1           | 1         | 800.13               | 25.0     | 1               | 4             | 800-MQ-25C   | FALSE     | TRUE         | 36                     | No Exch               | 32.49                | No Exch             | 0.90                 | No Exch             | No Exch             | No Exch              | 0.040.0                | 0.040.0               | 100.00.0           | 0.040.0             | 59.240.0                         | 0.047                            | 740.0      | 0.047              | 0.047              | 0.047      |            |
| 43     | Val | -gamma_2 | Val 43-gamma_2     | Val 43-gamma_2_25C | 1           | 2         | 600.17               | 25.0     | 1               | 4             | 800-MQ-25C   | FALSE     | TRUE         | 36                     | No Exch               | 32.49                | No Exch             | 0.90                 | No Exch             | No Exch             | No Exch              | 0.040.0                | 0.040.0               | 100.00.0           | 0.040.0             | 61.440.0                         | 0.047                            | 740.0      | 0.047              | 0.047              | 0.047      |            |
| 43     | Val | -gamma_2 | Val 43-gamma_2     | Val 43-gamma_2_25C | 1           | 3         | 800.13               | 25.0     | 1               | 4             | 800-SQ-25C   | FALSE     | TRUE         | 36                     | No Exch               | 32.49                | No Exch             | 0.90                 | No Exch             | No Exch             | No Exch              | 0.040.0                | 0.040.0               | 100.00.0           | 0.040.0             | 59.240.0                         | 0.047                            | 740.0      | 0.047              | 0.047              | 0.047      |            |
| 43     | Val | -gamma_2 | Val 43-gamma_2     | Val 43-gamma_2_25C | 1           | 4         | 600.13               | 25.0     | 1               | 4             | 800-SQ-25C   | FALSE     | TRUE         | 36                     | No Exch               | 32.49                | No Exch             | 0.90                 | No Exch             | No Exch             | No Exch              | 0.040.0                | 0.040.0               | 100.00.0           | 0.040.0             | 55.740.0                         | 0.047                            | 740.0      | 0.047              | 0.047              | 0.047      |            |
| 44     | Leu | -delta_1 | Leu 44-delta_1     | Leu 44-delta_1_25C | 1           | 1         | 800.13               | 25.0     | 1               | 4             | 800-MQ-25C   | TRUE      | TRUE         | 36                     | 32                    | 4490.71              | 172.13              | 124.74               | 5.38                | 23.19               | 4.86e-15             | Param Not OK           | Param Not OK          | Param Not OK       | 1517.8147.3         | 72.342.4                         | 63.945.0                         | 2.140.0    | Param Not OK       | Param Not OK       |            |            |
| 44     | Leu | -delta_1 | Leu 44-delta_1     | Leu 44-delta_1_25C | 1           | 2         | 600.17               | 25.0     | 1               | 4             | 800-MQ-25C   | TRUE      | TRUE         | 36                     | 32                    | 4490.71              | 172.13              | 124.74               | 5.38                | 23.19               | 4.86e-15             | Param Not OK           | Param Not OK          | Param Not OK       | 1517.8147.3         | 28.644.1                         | 41.842.1                         | 2.140.0    | Param Not OK       | Param Not OK       |            |            |
| 44     | Leu | -delta_1 | Leu 44-delta_1     | Leu 44-delta_1_25C | 1           | 3         | 800.13               | 25.0     | 1               | 4             | 800-SQ-25C   | TRUE      | TRUE         | 36                     | 32                    | 4490.71              | 172.13              | 124.74               | 5.38                | 23.19               | 4.86e-15             | Param Not OK           | Param Not OK          | Param Not OK       | 1517.8147.3         | 72.342.4                         | 63.945.0                         | 2.140.0    | Param Not OK       | Param Not OK       |            |            |
| 44     | Leu | -delta_1 | Leu 44-delta_1     | Leu 44-delta_1_25C | 1           | 4         | 600.13               | 25.0     | 1               | 4             | 800-SQ-25C   | TRUE      | TRUE         | 36                     | 32                    | 4490.71              | 172.13              | 124.74               | 5.38                | 23.19               | 4.86e-15             | Param Not OK           | Param Not OK          | Param Not OK       | 1517.8147.3         | 54.942.1                         | 35.342.7                         | 2.140.0    | Param Not OK       | Param Not OK       |            |            |
| 44     | Leu | -delta_2 | Leu 44-delta_2     | Leu 44-delta_2_25C | 1           | 1         | 800.13               | 25.0     | 1               | 4             | 800-MQ-25C   | TRUE      | FALSE        | Fit Not OK             | Fit Not OK            | Fit Not OK           | Fit Not OK          | Fit Not OK           | Fit Not OK          | Fit Not OK          | Fit Not OK           | Fit Not OK             | Fit Not OK            | Fit Not OK         | Fit Not OK          | Fit Not OK                       | Fit Not OK                       | Fit Not OK | Fit Not OK         | Fit Not OK         | Fit Not OK | Fit Not OK |
| 44     | Leu | -delta_2 | Leu 44-delta_2     | Leu 44-delta_2_25C | 1           | 2         | 600.17               | 25.0     | 1               | 4             | 800-MQ-25C   | TRUE      | FALSE        | Fit Not OK             | Fit Not OK            | Fit Not OK           | Fit Not OK          | Fit Not OK           | Fit Not OK          | Fit Not OK          | Fit Not OK           | Fit Not OK             | Fit Not OK            | Fit Not OK         | Fit Not OK          | Fit Not OK                       | Fit Not OK                       | Fit Not OK | Fit Not OK         | Fit Not OK         | Fit Not OK | Fit Not OK |
| 44     | Leu | -delta_2 | Leu 44-delta_2     | Leu 44-delta_2_25C | 1           | 3         | 800.13               | 25.0     | 1               | 4             | 800-SQ-25C   | TRUE      | FALSE        | Fit Not OK             | Fit Not OK            | Fit Not OK           | Fit Not OK          | Fit Not OK           | Fit Not OK          | Fit Not OK          | Fit Not OK           | Fit Not OK             | Fit Not OK            | Fit Not OK         | Fit Not OK          | Fit Not OK                       | Fit Not OK                       | Fit Not OK | Fit Not OK         | Fit Not OK         | Fit Not OK | Fit Not OK |
| 44     | Leu | -delta_2 | Leu 44-delta_2     | Leu 44-delta_2_25C | 1           | 4         | 600.13               | 25.0     | 1               | 4             | 800-SQ-25C   | TRUE      | FALSE        | Fit Not OK             | Fit Not OK            | Fit Not OK           | Fit Not OK          | Fit Not OK           | Fit Not OK          | Fit Not OK          | Fit Not OK           | Fit Not OK             | Fit Not OK            | Fit Not OK         | Fit Not OK          | Fit Not OK                       | Fit Not OK                       | Fit Not OK | Fit Not OK         | Fit Not OK         | Fit Not OK | Fit Not OK |
| 45     | lle | -delta_1 | lle 45-delta_1     | lle 45-delta_1_25C | 1           | 1         | 800.13               | 25.0     | 1               | 4             | 800-MQ-25C   | TRUE      | TRUE         | 36                     | 32                    | 587.81               | 20.49               | 16.33                | 0.64                | 25.50               | 1.09e-15             | 0.040.0                | 1.0e0.2               | 96.447.3           | 1679.12993.3        | 54.941.5                         | 21.041.4                         | 1.540.3    | 60.9411.6          | 1618.2408.1        |            |            |
| 45     | lle | -delta_1 | lle 45-delta_1     | lle 45-delta_1_25C | 1           | 2         | 600.17               | 25.0     | 1               | 4             | 800-MQ-25C   | TRUE      | TRUE         | 36                     |                       |                      |                     |                      |                     |                     |                      |                        |                       |                    |                     |                                  |                                  |            |                    |                    |            |            |

Table S2\_Subtilis

Global fit of site-specific  $\Delta_{\text{iso}}$ ,  $\Delta_{\text{iso}}$ , and  $R_2$  with fixed  $P_{\text{ex}} = 94.8\%$  and  $k_{\text{ex}} = 1629$  s

| AA<br>Num | Res | Atom     | Curset<br>Name | Group<br>Name      | Curset<br>Num | Curve<br>Num | $B_1$ (MHz) | Temp<br>(C) | Num of<br>Cursets | Num of<br>Curves | Dataset<br>Name | Exchange? | Best fit OK? | DeF <sup>14</sup><br>(NoEx) | DeF <sup>13</sup><br>(Ex) <sup>+</sup> | $\chi^2$<br>(NoEx) | $\chi^2$<br>(Ex) | $\chi^2$ Red <sup>+</sup><br>(NoEx) | $\chi^2$ Red <sup>+</sup><br>(Ex) | F <sup>14</sup><br>(Ex) | F <sup>13</sup> (For F <sup>14</sup> ) | $\Delta_{\text{iso}}$<br>(ppm) | $\Delta_{\text{iso}}$<br>(ppm) | $P_{\text{ex}}$ (%) | $k_{\text{ex}}$ (s) | $R_2$ (Hz) | $R_{\text{ex}}$ (Hz) | $\sigma$ (°) | $k_{\text{ex}}$ (s) | $k_{\text{ex}}$ (s) |
|-----------|-----|----------|----------------|--------------------|---------------|--------------|-------------|-------------|-------------------|------------------|-----------------|-----------|--------------|-----------------------------|----------------------------------------|--------------------|------------------|-------------------------------------|-----------------------------------|-------------------------|----------------------------------------|--------------------------------|--------------------------------|---------------------|---------------------|------------|----------------------|--------------|---------------------|---------------------|
| 10        | Val | -gamma_1 | Val 10-gamma_1 | Val 10-gamma_1_25C | 1             | 1            | 800.13      | 25.0        | 1                 | 4                | 800-MQ-25C      | TRUE      | TRUE         | 36                          | 32                                     | 107.85             | 50.64            | 3.00                                | 1.58                              | 1.89                    | 1:14e-01                               | 0.160, 1                       | 0.760, 1                       | 94.800              | 1629.000            | 57.817     | 20.1438              | 1.740, 1     | 84.400              | 1544.600            |
| 10        | Val | -gamma_1 | Val 10-gamma_1 | Val 10-gamma_1_25C | 2             | 2            | 800.17      | 25.0        | 1                 | 4                | 800-MQ-25C      | TRUE      | TRUE         | 36                          | 32                                     | 107.85             | 50.64            | 3.00                                | 1.58                              | 1.89                    | 1:14e-01                               | 0.160, 1                       | 0.760, 1                       | 94.800              | 1629.000            | 57.817     | 20.1438              | 1.740, 1     | 84.400              | 1544.600            |
| 10        | Val | -gamma_1 | Val 10-gamma_1 | Val 10-gamma_1_25C | 3             | 3            | 800.13      | 25.0        | 1                 | 4                | 800-MQ-25C      | TRUE      | TRUE         | 36                          | 32                                     | 107.85             | 50.64            | 3.00                                | 1.58                              | 1.89                    | 1:14e-01                               | 0.160, 1                       | 0.760, 1                       | 94.800              | 1629.000            | 57.817     | 20.1438              | 1.740, 1     | 84.400              | 1544.600            |
| 10        | Val | -gamma_1 | Val 10-gamma_1 | Val 10-gamma_1_25C | 4             | 4            | 600.13      | 25.0        | 1                 | 4                | 800-SQ-25C      | TRUE      | TRUE         | 36                          | 32                                     | 107.85             | 50.64            | 3.00                                | 1.58                              | 1.89                    | 1:14e-01                               | 0.160, 1                       | 0.760, 1                       | 94.800              | 1629.000            | 51.3114    | 12.4246              | 1.740, 1     | 84.400              | 1544.600            |
| 10        | Val | -gamma_2 | Val 10-gamma_2 | Val 10-gamma_2_25C | 1             | 1            | 800.13      | 25.0        | 1                 | 4                | 800-MQ-25C      | TRUE      | TRUE         | 36                          | 32                                     | 498.44             | 215.39           | 13.85                               | 6.73                              | 2.06                    | 6.67e-02                               | 0.040, 1                       | 1.040, 1                       | 94.800              | 1629.000            | 70.0427    | 29.0449              | 1.540, 1     | 84.400              | 1544.600            |
| 10        | Val | -gamma_2 | Val 10-gamma_2 | Val 10-gamma_2_25C | 2             | 2            | 600.17      | 25.0        | 1                 | 4                | 800-MQ-25C      | TRUE      | TRUE         | 36                          | 32                                     | 498.44             | 215.39           | 13.85                               | 6.73                              | 2.06                    | 6.67e-02                               | 0.040, 1                       | 1.040, 1                       | 94.800              | 1629.000            | 103.2433   | 18.8425              | 1.547, 1     | 84.400              | 1544.600            |
| 10        | Val | -gamma_2 | Val 10-gamma_2 | Val 10-gamma_2_25C | 3             | 3            | 800.13      | 25.0        | 1                 | 4                | 800-SQ-25C      | TRUE      | TRUE         | 36                          | 32                                     | 498.44             | 215.39           | 13.85                               | 6.73                              | 2.06                    | 6.67e-02                               | 0.040, 1                       | 1.040, 1                       | 94.800              | 1629.000            | 70.0427    | 29.0449              | 1.540, 1     | 84.400              | 1544.600            |
| 10        | Val | -gamma_2 | Val 10-gamma_2 | Val 10-gamma_2_25C | 4             | 4            | 600.13      | 25.0        | 1                 | 4                | 800-SQ-25C      | TRUE      | TRUE         | 36                          | 32                                     | 498.44             | 215.39           | 13.85                               | 6.73                              | 2.06                    | 6.67e-02                               | 0.040, 1                       | 1.040, 1                       | 94.800              | 1629.000            | 63.2223    | 18.8439              | 1.540, 1     | 84.400              | 1544.600            |
| 11        | Val | -gamma_1 | Val 11-gamma_1 | Val 11-gamma_1_25C | 1             | 1            | 800.13      | 25.0        | 1                 | 4                | 800-MQ-25C      | FALSE     | TRUE         | 36                          | No Exch                                | 107.32             | No Exch          | 2.98                                | No Exch                           | No Exch                 | No Exch                                | 0.040, 0                       | 0.040, 0                       | 100.000             | 0.040               | 62.0400    | 0.047                | 740.0        | 0.047               | 0.047               |
| 11        | Val | -gamma_1 | Val 11-gamma_1 | Val 11-gamma_1_25C | 2             | 2            | 600.17      | 25.0        | 1                 | 4                | 800-MQ-25C      | FALSE     | TRUE         | 36                          | No Exch                                | 107.32             | No Exch          | 2.98                                | No Exch                           | No Exch                 | No Exch                                | 0.040, 0                       | 0.040, 0                       | 100.000             | 0.040               | 57.8400    | 0.047                | 740.0        | 0.047               | 0.047               |
| 11        | Val | -gamma_1 | Val 11-gamma_1 | Val 11-gamma_1_25C | 3             | 3            | 800.13      | 25.0        | 1                 | 4                | 800-SQ-25C      | FALSE     | TRUE         | 36                          | No Exch                                | 107.32             | No Exch          | 2.98                                | No Exch                           | No Exch                 | No Exch                                | 0.040, 0                       | 0.040, 0                       | 100.000             | 0.040               | 62.0400    | 0.047                | 740.0        | 0.047               | 0.047               |
| 11        | Val | -gamma_1 | Val 11-gamma_1 | Val 11-gamma_1_25C | 4             | 4            | 600.13      | 25.0        | 1                 | 4                | 800-SQ-25C      | FALSE     | TRUE         | 36                          | No Exch                                | 107.32             | No Exch          | 2.98                                | No Exch                           | No Exch                 | No Exch                                | 0.040, 0                       | 0.040, 0                       | 100.000             | 0.040               | 60.8400    | 0.047                | 740.0        | 0.047               | 0.047               |
| 11        | Val | -gamma_2 | Val 11-gamma_2 | Val 11-gamma_2_25C | 1             | 1            | 800.13      | 25.0        | 1                 | 4                | 800-MQ-25C      | TRUE      | TRUE         | 36                          | 32                                     | 75.23              | 37.80            | 2.09                                | 1.18                              | 1.77                    | 1.70e-01                               | 0.160, 1                       | 0.460, 1                       | 94.800              | 1629.000            | 59.4409    | 5.9416               | 1.940, 1     | 84.400              | 1544.600            |
| 11        | Val | -gamma_2 | Val 11-gamma_2 | Val 11-gamma_2_25C | 2             | 2            | 600.17      | 25.0        | 1                 | 4                | 800-MQ-25C      | TRUE      | TRUE         | 36                          | 32                                     | 75.23              | 37.80            | 2.09                                | 1.18                              | 1.77                    | 1.70e-01                               | 0.160, 1                       | 0.460, 1                       | 94.800              | 1629.000            | 59.8227    | 5.9416               | 1.940, 1     | 84.400              | 1544.600            |
| 11        | Val | -gamma_2 | Val 11-gamma_2 | Val 11-gamma_2_25C | 3             | 3            | 800.13      | 25.0        | 1                 | 4                | 800-SQ-25C      | TRUE      | TRUE         | 36                          | 32                                     | 75.23              | 37.80            | 2.09                                | 1.18                              | 1.77                    | 1.70e-01                               | 0.160, 1                       | 0.460, 1                       | 94.800              | 1629.000            | 59.4409    | 5.9416               | 1.940, 1     | 84.400              | 1544.600            |
| 11        | Val | -gamma_2 | Val 11-gamma_2 | Val 11-gamma_2_25C | 4             | 4            | 600.13      | 25.0        | 1                 | 4                | 800-SQ-25C      | TRUE      | TRUE         | 36                          | 32                                     | 75.23              | 37.80            | 2.09                                | 1.18                              | 1.77                    | 1.70e-01                               | 0.160, 1                       | 0.460, 1                       | 94.800              | 1629.000            | 54.2412    | 3.4409               | 1.940, 1     | 84.400              | 1544.600            |
| 12        | Ile | -delta_1 | Ile 12-delta_1 | Ile 12-delta_1_25C | 1             | 1            | 800.13      | 25.0        | 1                 | 4                | 800-MQ-25C      | TRUE      | TRUE         | 36                          | 32                                     | 2215.39            | 81.52            | 61.54                               | 2.55                              | 24.16                   | 2.56e-15                               | 0.040, 0                       | 1.140, 0                       | 94.800              | 1629.000            | 52.8407    | 34.5410              | 1.440, 0     | 84.400              | 1544.600            |
| 12        | Ile | -delta_1 | Ile 12-delta_1 | Ile 12-delta_1_25C | 2             | 2            | 600.17      | 25.0        | 1                 | 4                | 800-MQ-25C      | TRUE      | TRUE         | 36                          | 32                                     | 2215.39            | 81.52            | 61.54                               | 2.55                              | 24.16                   | 2.56e-15                               | 0.040, 0                       | 1.140, 0                       | 94.800              | 1629.000            | 64.3409    | 23.2408              | 1.447, 0     | 84.400              | 1544.600            |
| 12        | Ile | -delta_1 | Ile 12-delta_1 | Ile 12-delta_1_25C | 3             | 3            | 800.13      | 25.0        | 1                 | 4                | 800-SQ-25C      | TRUE      | TRUE         | 36                          | 32                                     | 2215.39            | 81.52            | 61.54                               | 2.55                              | 24.16                   | 2.56e-15                               | 0.040, 0                       | 1.140, 0                       | 94.800              | 1629.000            | 52.8407    | 34.5410              | 1.440, 0     | 84.400              | 1544.600            |
| 12        | Ile | -delta_1 | Ile 12-delta_1 | Ile 12-delta_1_25C | 4             | 4            | 600.13      | 25.0        | 1                 | 4                | 800-SQ-25C      | TRUE      | TRUE         | 36                          | 32                                     | 2215.39            | 81.52            | 61.54                               | 2.55                              | 24.16                   | 2.56e-15                               | 0.040, 0                       | 1.140, 0                       | 94.800              | 1629.000            | 46.9406    | 23.2408              | 1.440, 0     | 84.400              | 1544.600            |
| 15        | Leu | -delta_1 | Leu 15-delta_1 | Leu 15-delta_1_25C | 1             | 1            | 800.13      | 25.0        | 1                 | 4                | 800-MQ-25C      | FALSE     | TRUE         | 36                          | No Exch                                | 59.91              | No Exch          | 1.66                                | No Exch                           | No Exch                 | No Exch                                | 0.040, 0                       | 0.040, 0                       | 100.000             | 0.040               | 55.4400    | 0.047                | 740.0        | 0.047               | 0.047               |
| 15        | Leu | -delta_1 | Leu 15-delta_1 | Leu 15-delta_1_25C | 2             | 2            | 600.17      | 25.0        | 1                 | 4                | 800-MQ-25C      | FALSE     | TRUE         | 36                          | No Exch                                | 59.91              | No Exch          | 1.66                                | No Exch                           | No Exch                 | No Exch                                | 0.040, 0                       | 0.040, 0                       | 100.000             | 0.040               | 36.0400    | 0.047                | 740.0        | 0.047               | 0.047               |
| 15        | Leu | -delta_1 | Leu 15-delta_1 | Leu 15-delta_1_25C | 3             | 3            | 800.13      | 25.0        | 1                 | 4                | 800-SQ-25C      | FALSE     | TRUE         | 36                          | No Exch                                | 59.91              | No Exch          | 1.66                                | No Exch                           | No Exch                 | No Exch                                | 0.040, 0                       | 0.040, 0                       | 100.000             | 0.040               | 55.4400    | 0.047                | 740.0        | 0.047               | 0.047               |
| 15        | Leu | -delta_1 | Leu 15-delta_1 | Leu 15-delta_1_25C | 4             | 4            | 600.13      | 25.0        | 1                 | 4                | 800-SQ-25C      | FALSE     | TRUE         | 36                          | No Exch                                | 59.91              | No Exch          | 1.66                                | No Exch                           | No Exch                 | No Exch                                | 0.040, 0                       | 0.040, 0                       | 100.000             | 0.040               | 46.8400    | 0.047                | 740.0        | 0.047               | 0.047               |
| 15        | Leu | -delta_2 | Leu 15-delta_2 | Leu 15-delta_2_25C | 1             | 1            | 800.13      | 25.0        | 1                 | 4                | 800-MQ-25C      | FALSE     | TRUE         | 36                          | No Exch                                | 19.34              | No Exch          | 0.54                                | No Exch                           | No Exch                 | No Exch                                | 0.040, 0                       | 0.040, 0                       | 100.000             | 0.040               | 50.0400    | 0.047                | 740.0        | 0.047               | 0.047               |
| 15        | Leu | -delta_2 | Leu 15-delta_2 | Leu 15-delta_2_25C | 2             | 2            | 600.17      | 25.0        | 1                 | 4                | 800-MQ-25C      | FALSE     | TRUE         | 36                          | No Exch                                | 19.34              | No Exch          | 0.54                                | No Exch                           | No Exch                 | No Exch                                | 0.040, 0                       | 0.040, 0                       | 100.000             | 0.040               | 50.0400    | 0.047                | 740.0        | 0.047               | 0.047               |
| 15        | Leu | -delta_2 | Leu 15-delta_2 | Leu 15-delta_2_25C | 3             | 3            | 800.13      | 25.0        | 1                 | 4                | 800-SQ-25C      | FALSE     | TRUE         | 36                          | No Exch                                | 19.34              | No Exch          | 0.54                                | No Exch                           | No Exch                 | No Exch                                | 0.040, 0                       | 0.040, 0                       | 100.000             | 0.040               | 50.0400    | 0.047                | 740.0        | 0.047               | 0.047               |
| 15        | Leu | -delta_2 | Leu 15-delta_2 | Leu 15-delta_2_25C | 4             | 4            | 600.13      | 25.0        | 1                 | 4                | 800-SQ-25C      | FALSE     | TRUE         | 36                          | No Exch                                | 19.34              | No Exch          | 0.54                                | No Exch                           | No Exch                 | No Exch                                | 0.040, 0                       | 0.040, 0                       | 100.000             | 0.040               | 46.8400    | 0.047                | 740.0        | 0.047               | 0.047               |
| 19        | Val | -gamma_1 | Val 19-gamma_1 | Val 19-gamma_1_25C | 1             | 1            | 800.13      | 25.0        | 1                 | 4                | 800-MQ-25C      | FALSE     | TRUE         | 36                          | No Exch                                | 25.39              | No Exch          | 0.71                                | No Exch                           | No Exch                 | No Exch                                | 0.040, 0                       | 0.040, 0                       | 100.000             | 0.040               | 56.4400    | 0.047                | 740.0        | 0.047               | 0.047               |
| 19        | Val | -gamma_1 | Val 19-gamma_1 | Val 19-gamma_1_25C | 2             | 2            | 600.17      | 25.0        | 1                 | 4                | 800-MQ-25C      | FALSE     | TRUE         | 36                          | No Exch                                | 25.39              | No Exch          | 0.71                                | No Exch                           | No Exch                 | No Exch                                | 0.040, 0                       | 0.040, 0                       | 100.000             | 0.040               | 43.6400    | 0.047                | 740.0        | 0.047               | 0.047               |
| 19        | Val | -gamma_1 | Val 19-gamma_1 | Val 19-gamma_1_25C | 3             | 3            | 800.13      | 25.0        | 1                 | 4                | 800-SQ-25C      | FALSE     | TRUE         | 36                          | No Exch                                | 25.39              | No Exch          | 0.71                                | No Exch                           | No Exch                 | No Exch                                | 0.040, 0                       | 0.040, 0                       | 100.000             | 0.040               | 56.4400    | 0.047                | 740.0        | 0.047               | 0.047               |
| 19        | Val | -gamma_1 | Val 19-gamma_1 | Val 19-gamma_1_25C | 4             | 4            | 600.13      | 25.0        | 1                 | 4                | 800-SQ-25C      | FALSE     | TRUE         | 36                          | No Exch                                | 25.39              | No Exch          | 0.71                                | No Exch                           | No Exch                 | No Exch                                | 0.040, 0                       | 0.040, 0                       | 100.000             | 0.040               | 51.7400    | 0.047                | 740.0        | 0.047               | 0.047               |
| 19        | Val | -gamma_2 | Val 19-gamma_2 | Val 19-gamma_2_25C | 1             | 1            | 800.13      | 25.0        | 1                 | 4                | 800-MQ-25C      | FALSE     | TRUE         | 36                          | No Exch                                | 24.25              | No Exch          | 0.67                                | No Exch                           | No Exch                 | No Exch                                | 0.040, 0                       | 0.040, 0                       | 100.000             | 0.040               | 55.1400    | 0.047                | 740.0        | 0.047               | 0.047               |
| 19        | Val | -gamma_2 | Val 19-gamma_2 | Val 19-gamma_2_25C | 2             | 2            | 600.17      | 25.0        | 1                 | 4                | 800-MQ-25C      | FALSE     | TRUE         | 36                          | No Exch                                | 24.25              | No Exch          | 0.67                                | No Exch                           | No Exch                 | No Exch                                | 0.040, 0                       | 0.040, 0                       | 100.000             | 0.040               | 39.1400    | 0.047                | 740.0        | 0.047               | 0.047               |
| 19        | Val | -gamma_2 | Val 19-gamma_2 | Val 19-gamma_2_25C | 3             | 3            | 800.13      | 25.0        | 1                 | 4                | 800-SQ-25C      | FALSE     | TRUE         | 36                          | No Exch                                | 24.25              | No Exch          | 0.67                                | No Exch                           | No Exch                 | No Exch                                | 0.040, 0                       | 0.040, 0                       | 100.000             | 0.040               | 55.1400    | 0.047                | 740.0        | 0.047               | 0.047               |
| 19        | Val | -gamma_2 | Val 19-gamma_2 | Val 19-gamma_2_25C |               |              |             |             |                   |                  |                 |           |              |                             |                                        |                    |                  |                                     |                                   |                         |                                        |                                |                                |                     |                     |            |                      |              |                     |                     |
